# Supplementary material
Source: publisher figshare collection journal article supplement (https://frontiersin.figshare.com/ndownloader/files/20794881)
Supplement: Supplementary file 1 [file 20794881]

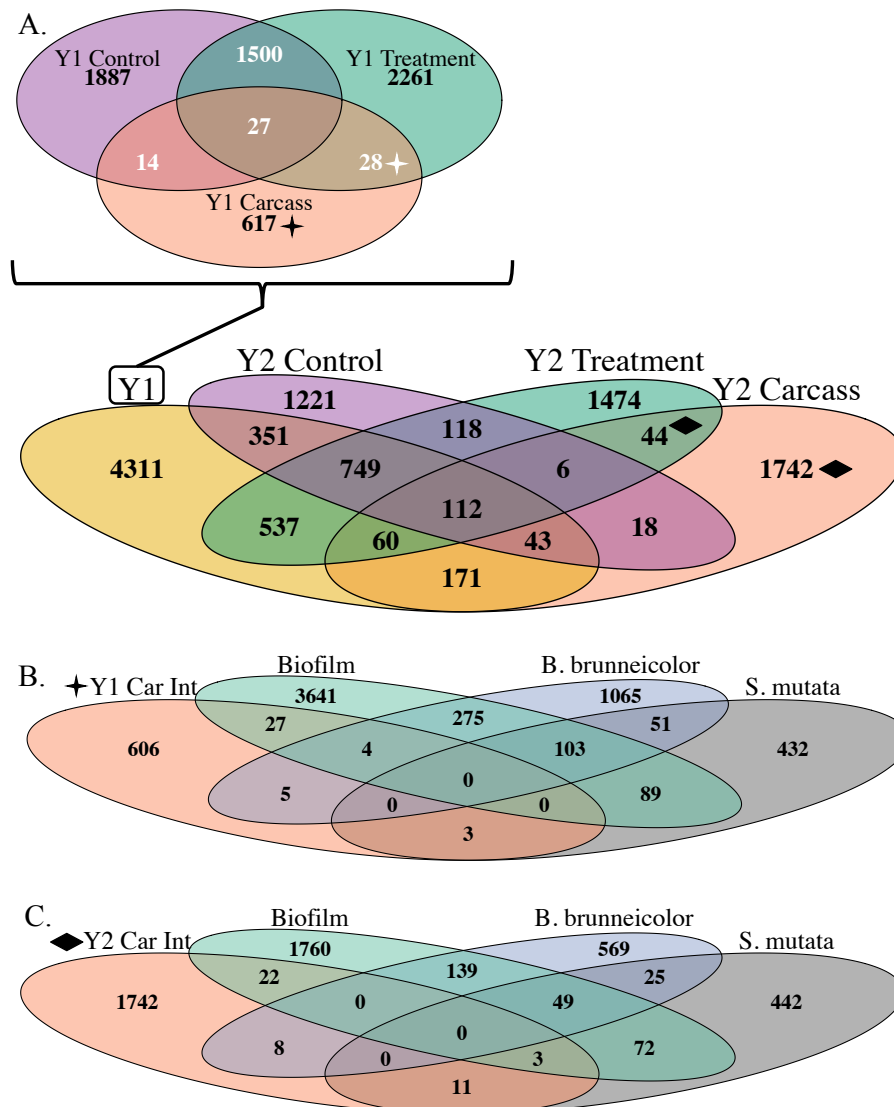

**Figure S6. Venn diagrams of shared OTUs between the following environments:** Year one salmon treatment reach environmental samples (biofilm, *B. brunneicolor*, and *S. mutata*; Y1 Treatment), salmon carcass surface in year one (Y1 Carcass), and control reach environmental samples in year two (Y1 Control), which make up all year one samples (Y1). These Y1 OTUs are compared with year two salmon treatment reach environmental samples (Y2 Treatment), year two control reach environmental samples (Y2 Control), and salmon carcass surface in year two (Y2 Carcass) (A). Year one carcass introduced OTUs (Y1 Carc Int), salmon treatment reach biofilms from both years (Biofilm), salmon treatment reach internal *B. brunneicolor* from both years (*B. brunneicolor*), and salmon treatment reach internal *S. mutata* from both years (*S. mutata*) (B); year two carcass introduced OTUs (Y2 Carc Int), year two salmon treatment reach biofilms (Biofilm), year two salmon treatment reach internal *B. brunneicolor* (*B. brunneicolor*), and year two salmon treatment reach internal *S. mutata* (*S. mutata*) (C). Plus sign denotes OTUs included in year one introduced OTUs, and diamond denotes OTUs included in year two introduced OTUs.
